1 Article type: Article

2

### 3 **Experimental evidence that thermal selection shapes**

### 4 **mitochondrial genome evolution**

5

6 Zdeněk Lajbner <sup>1\*</sup>, Reuven Pnini <sup>1</sup>, M. Florencia Camus <sup>2,3</sup>, Jonathan Miller <sup>1</sup>, Damian K.

7 Dowling <sup>2</sup>

8

9 <sup>1</sup> Physics and Biology Unit, Okinawa Institute of Science and Technology Graduate

10 University (OIST), 1919-1 Tancha, Onna-son, Okinawa 904-0945, Japan,

11 <sup>2</sup> School of Biological Sciences, Monash University, Clayton, Victoria 3800, Australia,

12 <sup>3</sup> Department of Genetics, Evolution & Environment, University College London, London

13 WC1E 6BT, UK.

14

15 \*Correspondence: Zdeněk Lajbner, Physics and Biology Unit, Okinawa Institute of Science

16 and Technology Graduate University (OIST), 1919-1 Tancha, Onna-son, Okinawa 904-0945,

17 Japan.

18 Email: z.lajbner@seznam.cz

19

20 Running head: Thermal selection on mitogenomes.

21

### 22 **Keywords**

23 mtDNA; hybridization; secondary contact; thermal selection; experimental evolution,

24 *Drosophila melanogaster*

25

26 Mitochondria are essential organelles found within eukaryotic cells, which contain their own  
27 DNA. Mitochondrial DNA (mtDNA) is frequently used in population genetic and  
28 biogeographic studies as a maternally-inherited and evolutionary-neutral genetic marker,  
29 despite increasing evidence that polymorphisms within the mtDNA sequence are sensitive to  
30 thermal selection. Currently, however, all published evidence for this “mitochondrial climatic  
31 adaptation” hypothesis is correlational. Here, we use laboratory-based experimental evolution  
32 in the fruit fly, *Drosophila melanogaster*, to test whether thermal selection can shift  
33 population frequencies of two mtDNA haplotypes, whose natural frequencies exhibit clinal  
34 associations with latitude along the Australian east-coast. We present experimental evidence  
35 the haplotypes changed in frequency, across generations, when subjected to different thermal  
36 regimes. Our results thus contradict the widely-accepted paradigm that intra-specific mtDNA  
37 variants are selectively neutral; suggesting spatial distributions of mtDNA haplotypes reflect  
38 adaptation to climatic environments rather than within-population coalescence and diffusion  
39 of selectively-neutral haplotypes across populations.

40

41

42 Mitochondrial DNA (mtDNA) is usually maternally inherited (Greiner et al. 2015), and has  
43 long been considered a neutral evolutionary marker (Moritz et al. 1987). Accordingly, the  
44 mtDNA has been routinely harnessed as the quintessential tool used in phylogenetics,  
45 population genetic studies, and phylogeographic reconstructions (Avice et al. 1987).  
46 However, non-neutral evolution of DNA can compromise historical inferences in population  
47 and evolutionary biology (Rand et al. 1994). New evidence published over the past decade  
48 has suggested that a sizeable amount of the genetic variation that exists within the  
49 mitochondrial genome is sensitive to natural selection, and exerts strong effects on the  
50 phenotype (Dowling et al. 2008, Dowling 2014, Wallace 2016). Furthermore, emerging data

51 indicate that not all mitochondrial haplotypes perform equally well under the same thermal  
52 conditions – some perform best when it is warmer, others when it is colder (Matsuura et al.  
53 1993, Doi et al. 1999, Dowling et al. 2007, Arnqvist et al. 2010, Wolff et al. 2016).  
54 Correlative molecular data in humans are also consistent with the idea that certain  
55 mitochondrial mutations might represent adaptations to cold climates (Mishmar et al. 2003,  
56 Ruiz-Pesini et al. 2004, Balloux et al. 2009, Luo et al. 2011), and thus support is growing for  
57 a “mitochondrial climatic adaptation” hypothesis, which suggests that polymorphisms that  
58 accumulate across mtDNA haplotypes found in different spatial locations have been shaped  
59 by selection to the prevailing climate.

60           However, these contentions remain debated primarily because the conclusions of  
61 previous studies are based on correlations between mutational patterns in the mtDNA  
62 sequence and climatic region, which have proven difficult to replicate in other or larger  
63 datasets (Kivisild et al. 2006, Sun et al. 2007). We therefore decided to apply an experimental  
64 evolution approach to test the mitochondrial climatic adaptation hypothesis, by determining  
65 whether multigenerational exposure of replicated populations of fruit flies to different  
66 thermal conditions leads to consistent changes in the population frequencies of naturally-  
67 occurring mtDNA haplotypes.

68           In the wild, different locally-adapted populations can routinely come into  
69 secondary contact and hybridize. This enables selection of novel mito-nuclear genotypes that  
70 might be better suited to a new or changing environment (Cannestrelli et al. 2016). This  
71 evolutionary scenario is common in the Anthropocene, when humans have rapidly and  
72 unprecedentedly changed both climatic conditions and levels of habitat connectivity (Lewis  
73 & Maslin 2015). We reproduced such a hybridization event under controlled laboratory  
74 conditions, by interbreeding two subpopulations of *D. melanogaster*, which had adapted to  
75 different thermal environments, at different ends of an established and well-studied

76 latitudinal cline (Hoffmann & Weeks 2007, Bergland et al. 2016). It is thought that the  
77 species was introduced into Australia during the past one to two hundred years, probably via  
78 recurrent introductions of flies from both African and European origins (David & Capy 1988,  
79 Bergland et al. 2016). The species has been studied extensively in the context of thermal  
80 adaptation along latitudinal clines, both within Australia, and other replicated clines in other  
81 continents (Hoffmann & Weeks 2007, Adrion et al. 2015, Bergland et al. 2016). This  
82 research has shown that numerous phenotypes related to thermal tolerance exhibit linear  
83 associations with latitude, and that these patterns are underscored by linear associations of  
84 key candidate nuclear genes (Hoffmann & Weeks 2007). Yet, no research had focused on the  
85 quantitative spatial distribution of mtDNA variants (Adrion et al. 2015), until Camus et al.  
86 (2017) reported that similar clinal patterns are found for two phylogenetic groups of mtDNA  
87 haplotypes along the eastern coast of Australia. Furthermore, Camus et al. (2017) were able  
88 to map these clinal patterns of mtDNA variation to the phenotype, showing that the mtDNA  
89 haplotype that predominates at subtropical latitudes confers superior resistance to extreme  
90 heat exposure, but inferior resistance to cold exposure than its temperate-predominant  
91 counterparts.

## 92 **Results**

93 We collected 20 mated-females from the Townsville subpopulation (latitude -19.26) and 20  
94 from Melbourne (latitude -37.99). These females were used to found isofemale lineages.  
95 Genotyping of these lines revealed two deeply-divergent mtDNA haplotypes that coexist in  
96 both of the wild subpopulations we sampled, but at different frequencies (Fig. 1). The  
97 haplotypes correspond with the haplogroups of Camus et al. (2017). The A haplotype is  
98 found to predominate in the low-latitude, hot, tropical subpopulation from Townsville (H),  
99 whilst the B haplotype predominates in the temperate, cooler Melbourne subpopulation (C).

100 Wild fruit flies are often hosts of intracellular parasites, such as *Wolbachia* and  
101 associated maternally-transmitted microbiomes that are known to manipulate host phenotypes  
102 (Fry et al. 2004, Hurst & Jiggins 2005, Koukou et al. 2006). In order to assess the effects of  
103 thermal selection on the standing mitochondrial variation in our experiment, both in the  
104 presence and the absence of these maternally-inherited microbiota that co-transmit with the  
105 mtDNA, we treated a full copy of our isofemale lineages with the antibiotic tetracycline  
106 hydrochloride, such that we maintained a full copy with putative *Wolbachia* and unperturbed  
107 microbiomes, and one copy without *Wolbachia* and with perturbed microbiomes.

108 After multigenerational acclimatisation to the laboratory, we combined the  
109 isofemale lineages, via an admixture procedure, to form 15 replicated experimental  
110 populations, seven of which were derived from tetracycline-treated lineages, and eight  
111 derived from untreated lineages (Fig. 2). Starting haplotype frequencies in our experimental  
112 populations reflect the composition of haplotypes in the wild populations. On average, 45%  
113 of flies at the outset of the experiment possessed the A haplotype and 55% the B haplotype.  
114 These frequencies were confirmed by individual genotyping of virtually all flies in all 15  
115 experimental populations, at this starting generation of the experimental evolution  
116 (Supplementary Table 1). Within each antibiotic treatment (ancestors tetracycline-treated

117 versus untreated), each of the experimental populations were then split into quadruplicates  
118 and each experimental subpopulation was then maintained at one of four different thermal  
119 conditions (Fig. 2). These were a constant 19°C, constant 25°C, fluctuating around a mean of  
120 17.4°C, and fluctuating around a mean of 26.4°C (see Methods for details). Selection was  
121 applied for the subsequent three generations for the two colder treatments, and for seven  
122 generations for the two warmer treatments (~3 months of experimental evolution). Following  
123 this, the haplotype frequencies of each experimental subpopulation were estimated, and  
124 changes in frequencies calculated. In total, 4410 fruit fly individuals were genotyped across  
125 the experiment (Supplementary Table 1).

126           We divided the dataset into four groups for analysis: females from populations  
127 treated with antibiotics (denoted FA), females from populations left untreated (FN), males  
128 from populations treated with antibiotics (MA), and males from populations left untreated  
129 (MN). We did this, since our main terms of interest centred on the level of the three-way  
130 interaction (sex × antibiotic treatment × thermal regime), which was significant in a mixed  
131 model analysis using maximum likelihood estimation (Extended Table 1). We found a  
132 statistically significant effect of the thermal regime on changes in haplotype frequencies  
133 sampled from females derived from antibiotic-treated lineages (Group FA,  $P =$   
134  $0.0152$  and power  $\equiv 1 - \beta = 78\%$ , Fig. 3, Table 1). In this group, we found that the  
135 frequency of the B haplotype, which is naturally predominant in the temperate south of  
136 Australia, had decreased in both of the warmer treatments, but increased in the cooler  
137 treatments; in concordance with patterns found along the Australian cline. That is, in the FA  
138 group, the A haplotype increased under positive selection in each of the warmer experimental  
139 conditions; these conditions reflect those experienced in our low latitude H subpopulation  
140 (estimated selection coefficient of the A haplotype for fluctuating warm conditions  $s_A =$

141 0.082±0.026; estimated selection coefficient of the B haplotype for fluctuating cold  
142 conditions ( $s_B = 0.085 \pm 0.050$ ).

143           There might also have been an effect of the thermal regime on changes in  
144 haplotype frequencies, sampled from males derived from antibiotic-untreated lineages  
145 (Group MN,  $P = 0.0702$ , power = 23%). However, the pattern of frequency change across the  
146 four thermal conditions was opposite to that observed in Group FA, with the frequency of the  
147 A haplotype increasing under colder temperatures, and the B haplotype under warmer  
148 temperatures.

149 **Discussion**

150 We have provided direct evidence that population-frequencies of naturally-occurring mtDNA  
151 haplotypes, sampled from a continuous distribution of *D. melanogaster* in east coast  
152 Australia, are shaped by thermal selection. However, our support for the mitochondrial  
153 climatic hypothesis was limited to the group of females whose ancestors had had their  
154 coevolved microbiomes, including *Wolbachia* infection, disrupted by antibiotic treatment  
155 (FA). While the patterns observed in males derived from antibiotic-untreated lineages were  
156 opposite in their direction, we note that selection on mtDNA in males cannot directly  
157 contribute to shaping patterns of mtDNA variation between generations, because males  
158 virtually never transmit their mtDNA haplotypes to their offspring. As such, mitochondrial  
159 genomes are predicted to evolve under a sex-specific selective sieve (Innocenti et al. 2011),  
160 in which mutations in the mtDNA sequence that confer harm to males can nonetheless  
161 accumulate in wild populations, as long as these same mutations are neutral or beneficial for  
162 females (Frank & Hurst 1996, Gemmell et al. 2004, Camus et al. 2015). In the absence of  
163 inter-sexual positive pleiotropy, such male-expression specific mtDNA mutations could in  
164 theory shape patterns of haplotype frequencies within a generation, if they affect male-  
165 specific patterns of juvenile or adult survival, but would not be passed on to the next  
166 generation, and would thus not shape haplotype frequencies across generations. That said, we  
167 feel it is unlikely that such male-harming mutations could explain the patterns detected in  
168 males here, and indeed the A and B haplotypes are probably largely sex-general in their  
169 effects, at least on thermal tolerance phenotypes studied (Camus et al. 2017).

170           On the other hand, the haplotype frequencies sampled from male offspring in the  
171 antibiotic-free treatment might have been affected by *Wolbachia*-induced cytonuclear  
172 incompatibilities. In the wild, there is a latitudinal cline in *Wolbachia* presence (Hoffmann et  
173 al. 1998), indicating that *Wolbachia* prevalence itself might be shaped by thermal selection.



174 The low-latitude Australian sub-tropical populations exhibit higher levels of *Wolbachia*  
175 infection than higher latitude temperate populations (Hoffmann et al. 1998). The complicated  
176 host-parasite dynamics make predictions for future changes in mito-genomic compositions of  
177 wild fruit flies populations difficult (see Kriesner et al. 2016, Corbin et al. 2017). *Wolbachia*  
178 clades also exhibit habitat-specific fitness dynamics (Versace et al. 2014), and it is possible  
179 that different *Wolbachia*, or other microsymbiont, strains are linked to the two different  
180 mtDNA haplotypes studied here, given that each co-transmit with the mtDNA in perfect  
181 association along the maternal lineage, and that the mtDNA frequencies in the antibiotic-free  
182 treatments hitchhiked on frequency changes involving these microsymbiotic assemblages, as  
183 is expected by theory, and has been observed previously (Rasgon et al. 2006, Schuler et al.  
184 2016).

185 Mitochondrial genetic markers remain an important tool for population genetics,  
186 despite growing experimental evidence that mitochondrial genetic variation is affected by  
187 thermal (Camus et al. 2017), and other kinds of selection (Kazancıoğlu & Arnqvist 2014).  
188 The evolutionary trajectories of distinct mitochondrial haplotypes might, furthermore, be  
189 selected together with functionally-linked nuclear gene complexes (Wolff et al. 2014, Hill  
190 2015). This reinforces the point that phylogenetic, population-genetic, and biogeographic  
191 studies involving mtDNA should incorporate statistical tests to investigate the forces shaping  
192 sequence variation and evolution (Ballard & Kreitman 1995), and examine variation at  
193 multiple genetic loci (Galtier et al. 2009). Moreover, to date, researchers have focused mainly  
194 on the effects of nonsynonymous mutations in the evolutionary dynamics of mitochondrial  
195 genomes (James et al. 2016). However, the evidence is growing that mitochondrial molecular  
196 function is also affected by single nucleotides in synonymous and non-protein coding  
197 positions on mtDNA (Camus et al. 2017); a contention that is further supported by the current

198 study given that there are no non-synonymous SNPs separating the A and B haplotypes in  
199 this study (Camus et al. 2017).

200 Our study advances our understanding of DNA polymorphism by providing  
201 experimental evidence that thermal selection acts upon standing variation in the mtDNA  
202 sequence. Further research is, however, needed to resolve the dynamics of this thermal  
203 evolution; for instance, by determining whether thermal selection acts on the mtDNA  
204 sequence directly, or on epistatic combinations of mitochondrial-nuclear genotype; and  
205 whether thermal selection is the main driver of adaptive variation that we see within the  
206 mitochondrial genome or whether other environmental variables, such as the nutritional  
207 environment (Mossman et al. 2016), are salient. Furthermore, it remains unclear how much of  
208 the pool of non-neutral genetic variation that delineates distinct mitochondrial haplotypes has  
209 actually been shaped by adaptive relative to non-adaptive processes. Finally, almost all  
210 experimental work investigating the adaptive capacity of the mitochondrial genome has been  
211 conducted on just a few model invertebrate species (Dowling et al. 2010, Barreto & Burton  
212 2013, Kazancıoğlu & Arnqvist 2014, Camus et al. 2015), with few exceptions (Fontanillas et  
213 al. 2005, Boratyński et al. 2016), and this is due simply to the intractability of applying  
214 experimental evolutionary approaches to vertebrate species. Future studies should involve a  
215 combination of ecological and experimental evolutionary approaches with high resolution  
216 transcriptomics and proteomics applied more generally across eukaryotes, and also the  
217 development of tests enabling us to reliably uncover the footprint of thermal selection in wild  
218 populations (Sunnucks et al. 2017).

219 **References**

- 220 Adrion, J. R., Hahn, M. W. & Cooper, B. S. Revisiting classic clines in *Drosophila*  
221 *melanogaster* in the age of genomics. *Trends Genet.* **31**, 434–444 (2015).  
222
- 223 Arnqvist, G. *et al.* Genetic architecture of metabolic rate: environment specific epistasis  
224 between mitochondrial and nuclear genes in an insect. *Evolution* **64**, 3354-3363 (2010).  
225
- 226 Avise, J. C. *et al.* 1987. Intraspecific phylogeography: the mitochondrial DNA bridge  
227 between population genetics and systematics. *Annu. Rev. Ecol. Evol. Syst.* **18**, 489-522  
228 (1987).  
229
- 230 Ballard, J. W. O. & Kreitman, M. Is mitochondrial DNA a strictly neutral marker? *Trends*  
231 *Ecol. Evolut.* **10**, 485-488 (1995).  
232
- 233 Balloux, F., Handley, L. J. L., Jombart, T., Liu, H., & Manica, A. Climate shaped the  
234 worldwide distribution of human mitochondrial DNA sequence variation. *Proc. R. Soc. Lond.*  
235 *[Biol]* **276**, 3447-3455 (2009).  
236
- 237
- 238 Barreto, F. S. & Burton, R. S. Evidence for compensatory evolution of ribosomal proteins in  
239 response to rapid divergence of mitochondrial rRNA. *Mol. Biol. Evol.* **30**, 310-314 (2013).  
240
- 241 Bergland, A. O., Tobler, R., González, J., Schmidt, P. & Petrov, D. 2016. Secondary contact  
242 and local adaptation contribute to genome-wide patterns of clinal variation in *Drosophila*  
243 *melanogaster*. *Mol. Ecol.* **25**, 1157-1174 (2016).

244

245 Boratyński, Z., Ketola, T., Koskela, E. & Mappes, T. The sex specific genetic variation of  
246 energetics in bank voles, consequences of introgression? *Evol. Biol.* **43**, 37-47 (2016).

247

248 Camus, M. F., Wolf, J. B., Morrow, E. H. & Dowling, D. K. Single nucleotides in the  
249 mtDNA sequence modify mitochondrial molecular function and are associated with sex-  
250 specific effects on fertility and aging. *Curr. Biol.* **25**, 2717-2722 (2015).

251

252 Camus, M. F., Wolff, J. N., Sgrò, C. M. & Dowling, D. K. Experimental evidence that  
253 thermal selection has shaped the latitudinal distribution of mitochondrial haplotypes in  
254 Australian fruit flies. Preprint at <http://biorxiv.org/content/early/2017/04/26/103606> (2017).

255

256 Canestrelli, D. *et al.* The tangled evolutionary legacies of range expansion and hybridization.  
257 *Trends Ecol. Evolut.* **31**, 677-688 (2016).

258

259 Corbin, C., Heyworth, E. R., Ferrari, J. & Hurst, G. D. Heritable symbionts in a world of  
260 varying temperature. *Heredity* **118**, 10-20 (2017).

261

262 David, J. R. & Capy, P. Genetic variation of *Drosophila melanogaster* natural populations.  
263 *Trends Genet.* **4**, 106-111 (1988).

264

265 Doi, A., Suzuki, H. & Matsuura, E. T. 1999. Genetic analysis of temperature-dependent  
266 transmission of mitochondrial DNA in *Drosophila*. *Heredity* **82**, 555-560 (1999).

267

- 268 Dowling, D. K., Abiega, K. C. & Arnqvist, G. Temperature-specific outcomes of  
269 cytoplasmic-nuclear interactions on egg-to-adult development time in seed beetles. *Evolution*  
270 **61**, 194-201 (2007).
- 271
- 272 Dowling, D. K., Friberg, U. & Lindell, J. Evolutionary implications of nonneutral  
273 mitochondrial genetic variation. *Trends Ecol. Evolut.* **23**, 546-554 (2008).
- 274
- 275 Dowling, D. K., Meerupati, T. & Arnqvist, G. Cytonuclear interactions and the economics of  
276 mating in seed beetles. *Am. Nat.* **176**, 131-140 (2010).
- 277
- 278 Dowling, D. K. Evolutionary perspectives on the links between mitochondrial genotype and  
279 disease phenotype. *BBA-Gen. Subjects* **1840**, 1393-1403 (2014).
- 280
- 281 Fontanillas, P., Depraz, A., Giorgi, M. S. & Perrin, N. Nonshivering thermogenesis capacity  
282 associated to mitochondrial DNA haplotypes and gender in the greater white-toothed shrew,  
283 *Crocidura russula*. *Mol. Ecol.* **14**, 661-670 (2005).
- 284
- 285 Frank, S. A. & Hurst, L. D. Mitochondria and male disease. *Nature* **383**, 224 (1996).
- 286
- 287 Fry, A. J., Palmer M. R. & Rand, D. M. Variable fitness effects of *Wolbachia* infection in  
288 *Drosophila melanogaster*. *Heredity* **93**, 379–389 (2004).
- 289
- 290 Galtier, N., Nabholz, B., Glemin, S. & Hurst, G. D. D. Mitochondrial DNA as a marker of  
291 molecular diversity: a reappraisal. *Mol. Ecol.* **18**, 4541-4550 (2009).
- 292

- 293 Gemmell, N. J., Metcalfe, V. J. & Allendorf, F. W. Mother's curse: the effect of mtDNA on  
294 individual fitness and population viability. *Trends Ecol. Evolut.* **19**, 238-244 (2004).  
295
- 296 Greiner, S., Sobanski, J. & Bock, R. Why are most organelle genomes transmitted  
297 maternally? *BioEssays* **37**, 80-94 (2015).  
298
- 299 Hill, G. E. Mitonuclear ecology. *Mol. Biol. Evol.* **32**, 1917-1927 (2015).  
300
- 301 Hoffmann, A. A., Hercus, M. & Dagher, H. Population dynamics of the *Wolbachia* infection  
302 causing cytoplasmic incompatibility in *Drosophila melanogaster*. *Genetics* **148**, 221-231  
303 (1998).  
304
- 305 Hoffmann A. A. & Weeks A. R. Climatic selection on genes and traits after a 100 year-old  
306 invasion: a critical look at the temperate-tropical clines in *Drosophila melanogaster* from  
307 eastern Australia. *Genetica* **129**, 133-147 (2007).  
308
- 309 Hurst, G. D. & Jiggins, F. M. Problems with mitochondrial DNA as a marker in population,  
310 phylogeographic and phylogenetic studies: the effects of inherited symbionts. *Proc. R. Soc.*  
311 *Lond. [Biol]* **272**, 1525-1534 (2005).  
312
- 313 Innocenti, P., Morrow, E. H. & Dowling, D. K. Experimental evidence supports a sex-  
314 specific selective sieve in mitochondrial genome evolution. *Science* **332**, 845-848 (2011).  
315
- 316 James, J. E., Piganeau, G. & Eyre-Walker, A. The rate of adaptive evolution in animal  
317 mitochondria. *Mol. Ecol.* **25**, 67-78 (2016).

318

319 Kazancıoğlu, E., & Arnqvist, G. The maintenance of mitochondrial genetic variation by  
320 negative frequency-dependent selection. *Ecol. Lett.* **17**, 22-27 (2014).

321

322 Kivisild, T. *et al.* The role of selection in the evolution of human mitochondrial genomes.  
323 *Genetics* **172**, 373–387 (2006).

324

325 Koukou, K. *et al.* Influence of antibiotic treatment and *Wolbachia* curing on sexual isolation  
326 among *Drosophila melanogaster* cage populations. *Evolution* **60**, 87-96 (2006).

327

328 Kriesner, P., Conner, W. R., Weeks, A. R., Turelli, M. & Hoffmann, A. A. (2016).  
329 Persistence of a *Wolbachia* infection frequency cline in *Drosophila melanogaster* and the  
330 possible role of reproductive dormancy. *Evolution* **70**, 979-997 (2016).

331

332 Lewis, S. L. & Maslin, M. A. Defining the Anthropocene. *Nature* **519**, 171-180 (2015).

333

334 Luo, Y., Gao, W., Liu, F. & Gao, Y. Mitochondrial nt3010G-nt3970C haplotype is  
335 implicated in high-altitude adaptation of Tibetans. *Mitochondrial DNA* **22**, 181-190 (2011).

336

337 Matsuura, E. T., Niki, Y. & Chigusa, S. I. Temperature-dependent selection in the  
338 transmission of mitochondrial-DNA in *Drosophila*. *Jpn. J. Genet.* **68**, 127-135 (1993).

339

340 Mishmar, D. *et al.* Natural selection shaped regional mtDNA variation in humans. *P. Natl.*  
341 *Acad. Sci. USA* **100**, 171-176 (2003).

342

343 Moritz, C., Dowling, T. E. & Brown, W. M. Evolution of animal mitochondrial DNA:  
344 relevance for population biology and systematics. *Annu. Rev. Ecol. Evol. Syst.* **18**, 269-292  
345 (1987).  
346  
347 Mossman, J. A., Biancani, L. M. & Rand, D. M. Mitonuclear epistasis for development time  
348 and its modification by diet in *Drosophila*. *Genetics* **203**, 463-484 (2016).  
349  
350 Rand, D. M., Dorfsman, M. & Kann, L. M. Neutral and non-neutral evolution of *Drosophila*  
351 mitochondrial DNA. *Genetics* **138**, 741-756 (1994).  
352  
353 Rasgon, J. L., Cornel, A. J. & Scott, T. W., 2006. Evolutionary history of a mosquito  
354 endosymbiont revealed through mitochondrial hitchhiking. *Proc. R. Soc. Lond. [Biol]* **273**,  
355 1603-1611 (2006).  
356  
357 Ruiz-Pesini, E., Mishmar, D., Brandon, M., Procaccio, V. & Wallace, D. C. Effects of  
358 purifying and adaptive selection on regional variation in human mtDNA. *Science* **303**, 223-  
359 226 (2004).  
360  
361 Schuler, H. *et al.* The hitchhiker's guide to Europe: the infection dynamics of an ongoing  
362 *Wolbachia* invasion and mitochondrial selective sweep in *Rhagoletis cerasi*. *Mol. Ecol.* **25**,  
363 1595-1609 (2016).  
364  
365 Sun, C., Kong, Q.-P. & Zhang, Y.-P. The role of climate in human mitochondrial DNA  
366 evolution: A reappraisal. *Genomics* **89**, 338-342 (2007).  
367



- 368 Sunnucks, P., Morales, H. E., Lamb, A. M., Pavlova, A. & Greening, C. Integrative  
369 approaches for studying mitochondrial and nuclear genome co-evolution in oxidative  
370 phosphorylation. *Front. Genet.* **8**, 25 (2017).  
371
- 372 Versace, E., Nolte, V., Pandey, R. V., Tobler, R. & Schlötterer, C. Experimental evolution  
373 reveals habitat-specific fitness dynamics among *Wolbachia* clades in *Drosophila*  
374 *melanogaster*. *Mol. Ecol.* **23**, 802-814 (2014).  
375
- 376 Wallace, D. C. Genetics: Mitochondrial DNA in evolution and disease. *Nature* **535**, 498-500  
377 (2016).  
378
- 379 Wolff, J. N., Ladoukakis, E. D., Enríquez, J. A. & Dowling, D. K. Mitonuclear interactions:  
380 evolutionary consequences over multiple biological scales. *Phil. Trans. R. Soc. B* **369**,  
381 20130443 (2014).  
382
- 383 Wolff, J. N., Tompkins, D. M., Gemmell, N. J. & Dowling, D. K. Mitonuclear interactions,  
384 mtDNA-mediated thermal plasticity, and implications for the Trojan Female Technique for  
385 pest control. *Sci. Rep.* **6**, 30016 (2016).

386 **Acknowledgements**

387 We thank Vanessa Kellerman and Winston Yee for assistance with wild sample collection,  
388 and Mary Ann Price, Carla Sgrò, Ritsuko Suyama, Garth Illsley, Richard Lee, Nicholas  
389 Luscombe, Pavel Munclinger, Takeshi Noda, and Oleg Simakov for helpful advices. We  
390 thank Yuan Liu for help with artwork design. This work was supported by the Physics and  
391 Biology Unit of the Okinawa Institute of Science and Technology Graduate University (J.M.)  
392 and JSPS P12751 + 24 2751 to Z.L. and J.M, the Hermon-Slade Foundation (HSF 15/2) and  
393 the Australian Research Council (FT160100022) to D.K.D. Initial stages of the study were  
394 funded by Go8EURFA11 2011003556 to Z.L. and D.K.D.

395

396 **Author Contributions**

397 Z.L. and D.K.D. designed the experiment. Z.L. performed the experiment. Z.L. and M.F.C.  
398 provided mitogenomic sequences. R.P. performed the major part of data analyses. Z.L.,  
399 D.K.D., M.F.C., and J.M. contributed to the data analyses. Z.L., D.K.D., R.P., M.F.C., and  
400 J.M. wrote the manuscript.

401

402 **Competing Financial Interests**

403 The authors declare no competing financial interests.

404

405

406 **Figures**

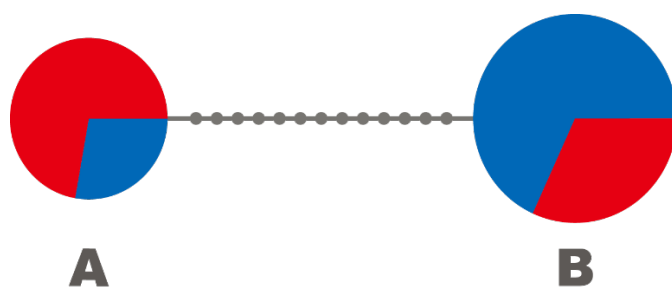

408 **Figure 1: Relationship of mtDNA haplotypes A and B.**

409 The circle area for each haplotype is proportional to its frequency in the wild sample (A=18

410 females, B=22 females). Colours indicate the sampling region: Townsville (red, 20 females)

411 and Melbourne (blue, 20 females). Small grey circles represent genotyped-SNP divergence.

412

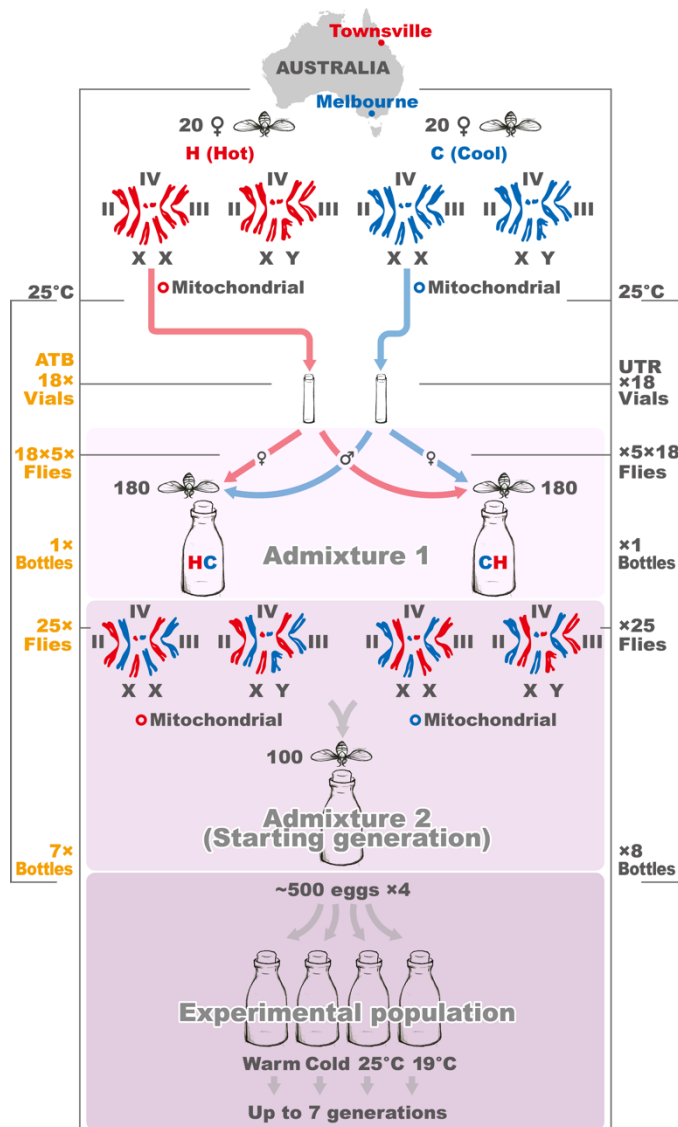

413

414 **Figure 2: Scheme of experimental evolution by hybridization of differentially thermally-**  
 415 **adapted subpopulations of fruit fly.**

416 Prior to the application of thermal selection, we created a series of replicated experimental  
 417 populations, by combining flies of isofemale lineages collected from the Melbourne  
 418 (putatively cool-adapted, or “C”) subpopulation, denoted in blue, and the Townsville  
 419 (putatively hot-adapted, “H”) subpopulation (red). This was achieved over two generations,  
 420 via a process of admixture of the individual isofemale lineages. In the Admixture 1 step, we  
 421 pooled 5 virgin females (♀) from each of 18 of the H isofemale lineages, with 5 virgin males  
 422 (♂) from each of 18 C isofemale lineages into one bottle, denoted by HC = 18×5(♀ H) +  
 423 18×5(♂ C). In parallel in Admixture 1, we performed the reciprocal cross wherein H <=>

424 C above, denoted by  $CH = 18 \times 5(\text{♀}C) + 18 \times 5(\text{♂}H)$ . Each bottle contained 90 males and  
425 90 females (180 flies). In the following generation, at Admixture step 2, we combined 25  
426 virgin females and 25 virgin males from HC bottles together with 25 virgin females and 25  
427 virgin males from CH bottles,  $25(\text{♂}CH) + 25(\text{♀}HC) + 25(\text{♀}CH) + 25(\text{♂}HC)$ , across 15  
428 biological replicates (7 of which were descendants of flies treated by antibiotics, 8 of which  
429 were descendants of untreated flies). At this stage, all flies had been maintained in standard  
430 laboratory conditions (25°C) for 16 generations (14 generations as isofemale lineages, 2  
431 during the admixture process). We then divided each of these 15 biological replicates into 4  
432 subpopulations, subjecting each subpopulation to one of four thermal treatments (19°C, 25°C,  
433 fluctuating cold, and fluctuating warm), with each experimental subpopulation containing  
434 around 500 individuals. On the left side of the figure, yellow text denotes sample sizes  
435 associated with each stage of the admixture process for flies whose ancestors had been  
436 exposed to antibiotic treatment (ATB), while grey text on the right corresponds with  
437 untreated flies (UTR).

438

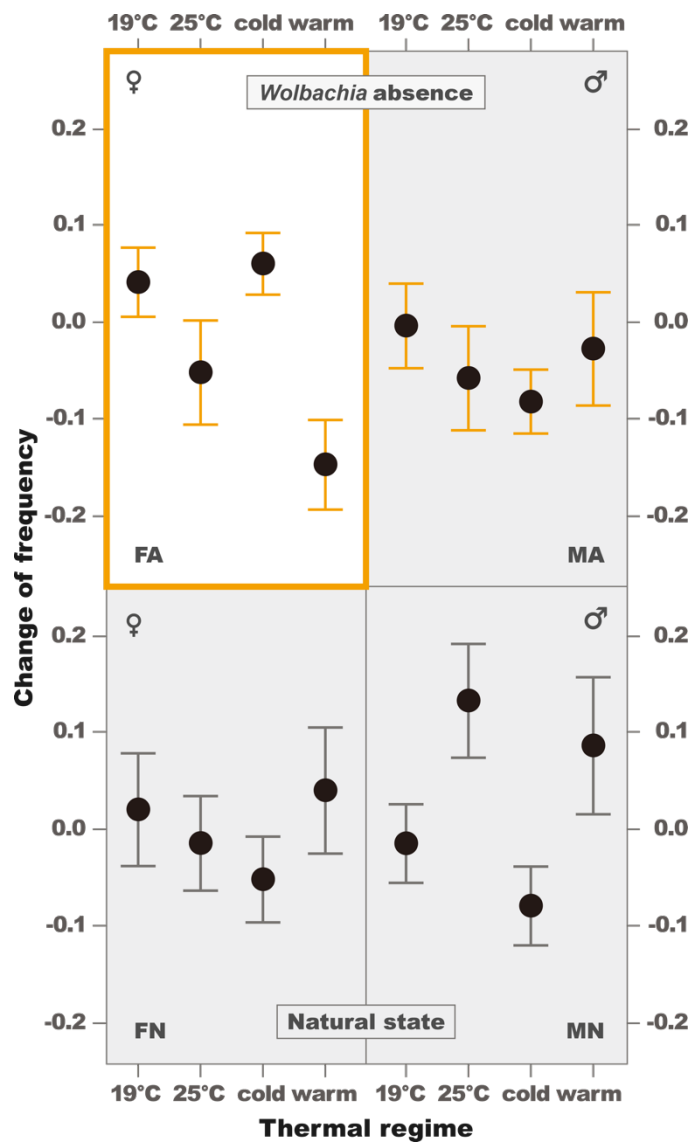

439

440

441 **Figure 3: Mean change of mtDNA haplotype B frequency per thermal environment.**

442 Interaction plots depict changing frequencies (final generation -initial generation) in stable

443 19°C, 25°C, fluctuating cold, and fluctuating warm environments for female and male

444 descendants of flies treated by antibiotics (FA, MA; 7 replicates) and untreated (FN, MN; 8

445 replicates; in which *Wolbachia* and associated maternally transmitted microbiomes present).

446 The error-bars are estimated using Eqs. (3-5).

447

448 **Table 1: The Wald statistics and the one-way ANOVA statistics for 4 population groups**  
 449 **(FA, FN, MA, MN).** (I) linear mixed model (II) fix effects only (III) the results of *lme4* and  
 450 (IV) one-way ANOVA. The *P*-values associated with Wald test (I, II) are calculated twice:  
 451 (*P*) for finite-size samples and (*P*<sub>∞</sub>) for large samples, assuming the validity of the asymptotic  
 452  $\chi^2$  distribution. The yellow background indicates statistical significance.  
 453

| Tab<br>3: | (I) mixed model |        |                       | (II) fixed effects ( $\rho_g^n \equiv 0$ ) |        |                       | (III) <i>lme4</i> |        | (IV) ANOVA |        |
|-----------|-----------------|--------|-----------------------|--------------------------------------------|--------|-----------------------|-------------------|--------|------------|--------|
|           | group           | W      | <i>P</i> <sub>∞</sub> | <i>P</i>                                   | W      | <i>P</i> <sub>∞</sub> | <i>P</i>          | W      | <i>P</i>   | F      |
| FA        | 16.5667         | 0.0009 | 0.0147                | 15.8185                                    | 0.0012 | 0.0169                | 17.4096           | 0.0006 | 4.2570     | 0.0152 |
| FN        | 1.7616          | 0.6233 | 0.6341                | 1.7296                                     | 0.6304 | 0.6406                | 1.7788            | 0.6195 | 0.4696     | 0.7059 |
| MA        | 2.0993          | 0.5521 | 0.5715                | 2.1414                                     | 0.5436 | 0.5639                | 1.4547            | 0.6928 | 0.4156     | 0.7433 |
| MN        | 10.0702         | 0.0180 | 0.0494                | 10.0724                                    | 0.0180 | 0.0521                | 8.9906            | 0.0264 | 2.6222     | 0.0702 |

454

455

456 **Methods** (3000 words)

457 **Experimental procedures**

458 Wild subpopulations of *D. melanogaster* were sampled in Australia. We sampled a hot  
459 adapted subpopulation (H; Townsville: -19.26, 146.79) in the north-east, and a cool adapted  
460 subpopulation (C; Melbourne: -37.99, 145.27) in the south of the continent. We collected  
461 fertilised females and established 20 isofemale lineages from each wild population. After 3  
462 generations of acclimatisation to laboratory conditions, we split each isofemale lineage into  
463 two replicates, and treated one replicate of each lineage with 0.164 mg mL<sup>-1</sup> tetracycline in  
464 food for 3 generations to remove any intracellular and cytoplasmically-inherited bacteria,  
465 such as *Wolbachia* (Clancy & Hoffman 1998). We then propagated these lineages for a  
466 further 10 generations to mitigate any effects of the antibiotic treatment. Flies were reared at  
467 25°C, on a 12:12 hour light:dark cycle, in 10 dram plastic vials, on a potato-dextrose-agar  
468 medium, with *ad libitum* live yeast added to each vial. All isofemale lineages were then  
469 transferred from our laboratories in Australia to those in Japan, and their food medium  
470 changed to a corn flour-glucose-agar medium (Supplementary Table 2), with *ad libitum* live  
471 yeast added to each vial. They acclimatized for a further 3 generations at 25°C, before  
472 entering an admixture process described below, in order to set up a series of replicated  
473 experimental populations.

474 We pooled 5 virgin females (♀) from each of 18 of the H isofemale lineages,  
475 mentioned above, with 5 virgin males (♂) from each of 18 of the C lineages in one bottle  
476 (HC = 18 x 5 ♀H + 18 x 5 ♂C), and 5 virgin females from each of the 18 C isofemale  
477 lineages with 5 virgin males from each of the 18 H isofemale lineages in another bottle (CH =  
478 18 x 5 ♀C + 18 x 5 ♂H), such that each bottle contained 90 males and 90 females. This step  
479 was performed separately for flies sourced from the tetracycline-treated isofemale lineages  
480 and flies sourced from untreated isofemale lineages, separately (Fig. 2; Supplementary Table



481 1). We then allowed the flies to lay eggs over 8 consecutive days, and transferred them to  
482 fresh bottles as indicated in Supplementary Table 3. We reared all experimental populations  
483 in 250 ml bottles on a corn flour-glucose-agar medium. In the next step, we mixed F1  
484 offspring (25 virgin males and 25 virgin females) from the HC bottles with corresponding F1  
485 offspring (25 virgin males and 25 virgin females) from the CH bottles (25 ♂CH + 25 ♀HC +  
486 25 ♀CH + 25 ♂HC). We established 7 experimental populations from the tetracycline-treated  
487 isofemale lineages and 8 experimental populations from the untreated lineages. We allowed  
488 flies of these populations to mate and lay eggs at 25°C, and then we transferred bottles with  
489 approximately 500 eggs into four thermal regimes, represented by cool versus warm  
490 temperatures, on either a constant or fluctuating temperature cycle. Bottles maintained in the  
491 cool and constant temperature were kept at a constant 19°C, and those in the warm and  
492 constant temperature at 25°C temperature. We used Environmental Chambers (MIR-154,  
493 Sanyo) to generate fluctuating thermal conditions that are common in areas of origin of our  
494 experimental populations (The Australian Government, Bureau of Meteorology), Melbourne:  
495 8:00(22°C); 11:30(28°C); 16:00(20°C); 20:00(17°C); 22:00(14°C); 8:00(15°C); 11:30(20°C);  
496 16:00(16°C); 20:00(15°C); 22:00(14°C), and Townsville: 8:00(27°C); 10:30(28°C);  
497 20:00(27°C); 22:30(26°C); 0:00(24°C); 8:00(26°C); 10:30(28°C); 20:00(27°C); 22:30(26°C);  
498 0:00(25°C). The temperature in all conditions was continually monitored and in fluctuating  
499 conditions recorded by Thermo-hydro SD Data Loggers (AD-5696; A&D Ltd). We  
500 propagated all replicate populations for three months (3 or 7 successive generations  
501 depending on the thermal condition; Supplementary Table 4). We regulated the size of each  
502 population by trimming egg numbers per generation to approximately 500 eggs. At the end of  
503 the experimental evolution period of three months, adult flies were collected and fixed in  
504 95% ethanol.  
505

506 **Data collection**

507 Total genomic DNA was extracted using DNeasy Blood & Tissue Kit (Qiagen). We  
508 sequenced total DNA of H and C population samples quantitatively, using an Illumina  
509 platform at Micromon (Monash University, Australia). Length of reads was set to 70bp and  
510 we reached a maximum coverage 500x on coding parts of mitogenomes (Camus et al. 2017).

511 We mapped all reads on published mitogenomic sequence NC 001709 in  
512 Geneious R6 (<http://www.geneious.com>, Kearse et al. 2012). We observed overall  
513 mitogenomic variability and picked 14 mtDNA polymorphic sites (SNPs), which are not  
514 unique to the H or C populations, which delineate all flies into one of two corresponding  
515 mtDNA haplotypes, which we denote A and B, and which are described in the Results (Fig.  
516 1, Supplementary Table 5), using multiplexPCR and MALDI/Tof (mass spectrometry;  
517 Geneworks, Australia). We genotyped virtually all flies in the starting generation (formed by  
518 50 males and 50 females per each of the 15 replicates), and then more than 24 males and 25  
519 females per bottle in final generation of the experiment, upon completion of experimental  
520 evolution. The minimal number of sequenced samples was estimated assuming the relative  
521 thermal effect of 10% at power of  $1 - \beta = 70\%$  and the F-distribution. In total, we  
522 genotyped 4410 individuals (Supplementary Table 1).

523

524 **Data analysis**

525 A multilevel linear model showed a significant three-way interaction between  
526 thermal regime, sex, and antibiotic treatment on the change in frequency of haplotype B  
527 (Extended Table 1). Accordingly, we divided the total of 60 experimental populations into 4  
528 groups: FA=females whose ancestors had been treated with antibiotics, FN=females  
529 untreated, MA=males whose ancestors had been treated with antibiotics, and MN=males  
530 untreated. Flies in each of these groups are propagated under 1 of 4 thermal treatments: 19°C,

531 25°C, fluctuating cold, fluctuating warm. The measured frequencies of haplotype B are thus  
 532 denoted as  $f_{gi}^n$ , where  $g = 1,2,3,4 = G$  stands for the group,  $i = 1,2,3,4 = T$  is the thermal  
 533 regime, and  $n = 1,2, \dots, N$  is the biological replicate's number. The frequencies  $f_{gi}^n$  are then  
 534 subtracted from the corresponding frequencies of the initial female population (regardless of  
 535 the sex we are examining),  $f_0^n$  and the frequency changes,  $y_{gi}^n = f_{gi}^n - f_0^n$  were fit to a linear  
 536 model (Kutner et al. 2013)

$$537 \quad y_{gi}^n = \theta_{gi} + \epsilon_{gi}^n \quad (i = 1,2,3,4 = T; n = 1,2, \dots, N) \quad (1)$$

538 where  $\theta_{gi}$  denotes the mean value of the frequency difference, obtained for thermal regime  $i$   
 539 in group  $g$  (averaged over  $N$  samples) and  $\epsilon_{gi}^n$  is the measurement noise associated with  
 540 sample  $b$ . The sample sizes in Eq. (1) are  $N=7$  for groups FA and MA, whose ancestors had  
 541 been treated with antibiotics, and  $N=8$  for untreated groups FN and MN. The statistical  
 542 properties of the Gaussian noise in (1) are defined by having zero mean,  $\langle \epsilon_{gi}^n \rangle = 0$ , and a  
 543 positive definite correlation matrix

$$544 \quad \langle \epsilon_{gi}^n \epsilon_{gj}^{n'} \rangle = \delta^{nn'} \sigma_{gi} \sigma_{gj} [\delta_{ij} (1 - \rho_g^n) + \rho_g^n] \quad (2)$$

545 Here, angular brackets  $\langle \dots \rangle$  denote ensemble averaging over the noise, so that  $\sigma_{gi}^2 = \langle (\epsilon_{gi}^n)^2 \rangle$   
 546 is the variance, and  $-\frac{1}{3} < \rho_g^n < 1$  is the correlation-coefficient associated with replicate  
 547 number  $n$ . The constraint imposed on  $\rho_g^n$  is required to ensure the positive-definiteness of the  
 548 correlation. Eq. (2) allows one to consider two distinctive random effects: (i) different noise  
 549 levels for each thermal regime, and (ii) possible dependencies between replicates which  
 550 belong to different regimes, and yet originated from the same parental generation.

551 The parameters in Eq. (2) can be estimated by a standard maximum-likelihood (ML)  
 552 calculation. Replacing ensemble averages by sampled means one obtains

$$553 \quad \hat{\theta}_{gi} = N^{-1} \sum_n y_{gi}^n, \quad \hat{\sigma}_{gi}^2 = N^{-1} \sum_n (y_{gi}^n - \hat{\theta}_{gi})^2 \quad (3)$$

554 where  $\hat{x}$  denotes an estimator of a random variable  $x$ . Note, that for sequel convenience,  $\hat{\sigma}_{gi}^2$   
 555 is normalized by the number of samples (rather than by  $N - 1$ ). Having  $\hat{\theta}_{gi}$  and  $\sigma_{gi}^2$  as written  
 556 in Eqs. (3), the ML estimator of  $\hat{\rho}_g^n$  is found by solving the following quadratic equation

$$557 \quad 12\rho_g^n = -(1 + 3\rho_g^n)(1 - \rho_g^n)(\delta y_g^n)^T [\Gamma(\rho_g^n)] \Omega [\Gamma(\rho_g^n)] (\delta y_g^n) \quad (4a)$$

558 where  $(\delta y_{gi}^n) \equiv y_{gi}^n - \hat{\theta}_{gi}$  is the 4-component (column) vector of fluctuations,  $(\delta y_{gi}^n)^T$  is the  
 559 corresponding transposed (row) vector,  $\Gamma(\rho_g^n)$  is the inverse of the correlation-matrix given  
 560 by

$$561 \quad \Gamma_{ii} = (1 + 2\rho_g^n)/[\hat{\sigma}_{gi}^2(3\rho_g^n + 1)(1 - \rho_g^n)], \Gamma_{i \neq j} = -\rho_g^n/[\hat{\sigma}_{gi}\hat{\sigma}_{gj}(3\rho_g^n + 1)(1 - \rho_g^n)] \quad (4b)$$

562 and  $\Omega$  is a traceless matrix of rank-1, such that  $\Omega_{ij} = \hat{\sigma}_{gi}\hat{\sigma}_{gj}(1 - \delta_{ij})$ . After solving Eq. (4a)  
 563 - for all values of  $b$  while keeping  $g$  fixed - the estimated errors of  $\hat{\theta}_{gi}$  [i.e., the fix-effect  
 564 errors presented in (1)] are found by inverting the Fisher information matrix (Cover &  
 565 Thomas 2006)  $\partial \log P/(\partial \theta_i \partial \theta_j)$ , where  $P$  is the joint probability distribution of  $y_{gi}^n$ . This  
 566 leads to an error-matrix of the form:

$$567 \quad (V_g)_{ij} \equiv \langle \delta \hat{\theta}_{gi} \delta \hat{\theta}_{gj} \rangle = \langle (\hat{\theta}_{gi} - \langle \hat{\theta}_{gi} \rangle) (\hat{\theta}_{gj} - \langle \hat{\theta}_{gj} \rangle) \rangle = -(H_g)_{ij}^{-1} = [\sum_b \Gamma_{ij}(\hat{\rho}_g^n)]^{-1} \quad (5)$$

568 with  $H_g$  being the Fisher matrix evaluated at the ML solution. Note, that when  $\hat{\rho}_g^n = 0$ , Eq.  
 569 (5) is reduced to the expected diagonal form:  $(V_g)_{ij} = \delta_{ij} \hat{\sigma}_{gi}^2/N$ .

570 Fig. 2 suggests that group FA (and to a lesser extent group MN), is showing some  
 571 degree of thermal selectivity. In order to quantify this assertion,  $\hat{\theta}_{gi}$  are re-parametrized as  
 572  $\hat{\theta}_{gi} = \mu_g + \alpha_{gi}$ , where  $\mu$  is the average over  $T = 4$  levels,  $\mu_g \equiv \sum_i \hat{\theta}_{gi} / T$ , and  
 573  $\sum_{i=1}^T \alpha_{gi} = 0$ . The F-statistic as defined by the standard 1-factor ANOVA, is then:  $F_g =$   
 574 [(mean-square-error between levels)/(mean-square-error within levels)]. Namely, for each  
 575 group separately,

$$576 \quad F_g = [\sum_{i=1}^T \alpha_{gi}^2 / (T - 1)] / \{ \sum_{i=1}^T \hat{\sigma}_{gi}^2 / [T(N - 1)] \} \quad (g = 1, 2, \dots, 4 = G) \quad (6)$$

577 with  $\{\hat{\theta}_{gi}, \hat{\sigma}_{gi}\}$  given in Eq. (3). The F-values for all groups, together with the corresponding  
 578  $P$ -values, are shown in Table 1 (IV). Indeed, group FA (females on antibiotics) exhibits a  
 579 significant thermal effect with sufficiently high power ( $P = 0.0152$  and power = 78%).  
 580 The  $P$ -value and power of  $F_g$  are given by:  $P = 1 - \Phi_{\nu_1, \nu_2}(F_g, \lambda = 0)$  and power  $\equiv 1 - \beta =$   
 581  $1 - \Phi_{\nu_1, \nu_2}(F_g, \lambda = TF_g)$ , where  $\Phi_{\nu_1, \nu_2}(f, \lambda)$  is the cumulative non-central F-distribution with  
 582 degrees-of-freedom  $\nu_1 = T - 1$ ,  $\nu_2 = T(N - 1)$ , and non-centrality parameter  $\lambda$ .

583 In addition to  $F_g$ , we also studied the Wald-statistic of the thermal effects which is  
 584 defined as  $W_g \equiv \alpha_g^T (\langle \delta \alpha_g \delta \alpha_g^T \rangle)^{-1} \alpha_g$ , where  $\alpha_g$  (with  $g$  kept fixed) is the vector of thermal  
 585 deviations,  $\alpha_{gi} = \hat{\theta}_{gi} - \mu_g$   $\{i = 1, 2, 3 = T - 1\}$ , and  $\delta \alpha$  the fluctuation  $\delta \alpha \equiv \alpha - \langle \alpha \rangle$ .  
 586 Introducing  $\vec{\theta}_g \equiv (\theta_{g1}, \dots, \theta_{g4})$ ,  $\vec{\tau}_g \equiv (\mu_g, \alpha_{g1}, \alpha_{g2}, \alpha_{g3})$  and changing variables,  $\vec{\tau}_g = \mathcal{R} \vec{\theta}_g$ ,  
 587 one finds that

$$588 \quad W_g = (R \hat{\theta}_g)^T (R V_g R^T)^{-1} (R \hat{\theta}_g) \quad (g = 1, 2, \dots, 4 = G) \quad (7)$$

589 where  $R$  is a  $3 \times 4$  transformation matrix ( $R_{ii} = 3/4, R_{i \neq j} = -1/4$ ), and  $V_g$  is the correlation  
 590 matrix previously given in Eq. (5). We have applied Eq. (7) both to a mixed model [in which  
 591  $\rho_g^n$  are obtained using Eq. (4a)], and to a fixed-effects model (in which all  $\rho_g^n$  vanish  
 592 identically and  $V_g$  is a diagonal matrix). The results are shown in Table 1 (I-II). For finite-size  
 593 samples,  $W_g/(T-1)$  is distributed according to the F-distribution (Engle 1984, Parker 2016).

594 Therefore, the  $P$ -values and power associated with  $W_g$  take the form:  $P = 1 -$   
 595  $\Phi_{\nu_1, \nu_2} \left[ \frac{W_g}{T-1}, \lambda = 0 \right]$ , power =  $1 - \beta = 1 - \Phi_{\nu_1, \nu_2} \left[ \frac{W_g}{T-1}, \frac{\lambda_w}{T-1} \right]$ , where  $\nu_1 = T - 1$  and  $\nu_2 =$   
 596  $N(T - 2) - (T - 1)$ . In the limit of large samples,  $N \gg 1$  [or, equivalently, when the  
 597 correlation  $V_g$  in Eq. (7) is given a-priori rather than being estimated],  $W_g$  is distributed as  $\chi^2$   
 598 with  $(T-1)$  degrees of freedom. As a result, the corresponding  $P$ -values decrease significantly  
 599 (see Table 1).

600 While the  $\chi^2$  distribution may be appropriate in large-sample studies, it is  
601 inapplicable in our case where  $N = (7,8)$ . Focusing on the statistically significant FA group  
602 ( $g = 1$ ), we've verified the cross-over of  $W_g$  from F to the  $\chi^2$  distribution and the  
603 consistency of expressions (6-7) by performing MC simulations. The starting point of the  
604 simulations is the set of 'actual parameters' as measured by the experiment:

605

$$606 \quad \hat{\theta} = [+0.0409, -0.0506, +0.0601, -0.1477], \hat{\sigma} = [0.0936, 0.1420, 0.0857, 0.1226]$$
$$\hat{\rho} = [+0.0408, +0.0427, +0.0917, +0.2002, -0.0771, +0.0758, -0.1162]$$

607

(8)

608 Using these empirical values, we generate an ensemble of 20,000 realizations of random  
609 frequencies – all sampled out of a multivariate Gaussian noise as defined by Eqs. (1-2). For  
610 each of these replicas we then infer a set of  $15 = 2T + N$  parameters  $\{\hat{\theta}_{gi}, \hat{\sigma}_{gi}, \hat{\rho}_g^n\}$  according  
611 to Eqs. (3-5). Finally, using Eqs. (6-7), we generate the statistics and compute histograms for  
612  $F_g$  and  $W_g$ . As shown in Extended Fig. 2, the simulated histograms are in good agreement  
613 with the theoretically expected non-central F-distributions (as well as the asymptotic non-  
614 central  $\chi^2$ ).

615 When the correlation matrix  $V_g$  in (7) is replaced by expression (2) with fixed  
616 parameters given by (8) - the Wald statistic crosses over from F to the  $\chi^2$  distribution.  
617 Consequently, the  $P$ -value of the experiment decreases:  $P = 0.0147 \rightarrow 9 \times 10^{-4}$  and the  
618 power decreases from 73% to about 60% (see Extended Fig. 1).

619 We compared the standard maximum likelihood estimation described in detail  
620 here with *lme4* v. 1.1-10 package (Bates et al. 2015) of R version 3.2.2. (R Development  
621 Core Team 2015) in RStudio server v. 099.465 (RStudio Team 2015). The average frequency  
622 differences for all groups,  $\hat{\theta}_{gi}$  ( $g = 1, 2, 3, 4$ ), together with their estimated errors,  $\delta\hat{\theta}_{gi}$ , are  
623 shown in Extended Table 2 (see also Fig. 3). The error estimates of *lme4* are level (i.e.,

624 thermal) independent and given by the RMS value,  $\hat{\theta}_{gi}^2 = \sum_i \hat{\sigma}_{gi}^2 / (NT)$ . This feature is  
625 presumably a result of the internal constraints that are imposed on the random model of *lme4*.  
626 Referring to Eq. (2), the constraints are:  $\sigma_{gi} = \sigma_g \forall i$ ,  $\sum_b \rho_g^n = 0$ . The differences in the error  
627 estimates between our computations [rows (I) and (II) in Extended Table 2] and the results of  
628 *lme4* [row (III)] are clear. The relative differences due to random effects seem to be rather  
629 small,  $|\delta \hat{\theta}_{gi}(I) - \delta \hat{\theta}_{gi}(II)| / |\hat{\theta}_{gi}| \leq 5\%$ .

630 Note, that our computation produces higher *P*-values i.e., “less significant” as  
631 compared to those of *lme4*. The reason being that, in calculating *P*-values out of the Wald  
632 statistics *lme4* implicitly assumes an infinite number of samples. In this limiting case, the  
633 Wald statistic  $W_g$  is distributed according to the  $\chi^2$  distribution and, as a result, the *P*-value  
634 decreases by an order of magnitude to give a  $P = 6 \times 10^{-4} - 9 \times 10^{-4}$  and power  $\cong$   
635 60%. Yet, the differences between  $W_g(I)$  and  $W_g(III)$ , shown in Table 1, are not sufficiently  
636 large to alter any of the conclusions related to statistical significance.

637 MtDNA is transmitted mainly maternally, but paternal mtDNA leakage is  
638 documented in our model organism (Nunes et al. 2013). For the reason, we verified using  
639 *lme4* that our results remain unchanged when one takes in account frequencies of both sexes  
640 in the starting generation (Supplementary Table 6). That is, the results remain qualitatively  
641 similar, and their interpretations identical, if we use the frequencies of males and females  
642 combined in the starting generation, rather than females only, in deriving the change in  
643 frequencies across the experiment.

644

645 References

646

647 Bates, D., Mächler, M., Bolker, B., & Walker, S. Fitting linear mixed-effects models using  
648 *lme4*. *J. Stat. Softw.* **67**, i01(2015).

649

650 Camus, M.F., Wolff, J. N., Sgrò, C. M. & Dowling, D. K. Experimental evidence that  
651 thermal selection has shaped the latitudinal distribution of mitochondrial haplotypes in  
652 Australian fruit flies. Preprint at <http://biorxiv.org/content/early/2017/04/26/103606> (2017).

653

654 Clancy, D. J. & Hoffmann, A. A. Environmental effects on cytoplasmic incompatibility and  
655 bacterial load in *Wolbachia*-infected *Drosophila simulans*. *Entomol. Exp. Appl.* **86**, 13-24  
656 (1998).

657

658 Cover T. M. & Thomas J. A. Elements of information theory, 2nd Ed. (John Willey & Sons,  
659 2006).

660

661 Engle R. F. Wald, likelihood ratio, and Lagrange multiplier tests in econometrics. in  
662 *Handbook of Econometrics, Vol. II* (eds Grilliches Z. & Intriligator M. D.) 775-826 (North-  
663 Holland, 1984).

664

665 Kearse, M. *et al.* Geneious Basic: an integrated and extendable desktop software platform for  
666 the organization and analysis of sequence data. *Bioinformatics*, **28**, 1647-1649 (2012).

667

668 Kutner, M. H., Nachtsheim, C. J., Nelder J. & Li, W. Applied linear statistical models, 5th Ed.  
669 (McGraw-Hill, 2013).

670

671 Nunes, M. S., Dolezal, M. & Schlötterer, C. Extensive paternal mtDNA leakage in natural  
672 populations of *Drosophila melanogaster*. *Mol. Ecol.* **22**, 2106–2117 (2013).

673



- 674 Parker, T. Finite-sample distributions of the Wald, likelihood ratio and Lagrange multiplier  
675 test statistics in the classical linear model. *Commun. Stat. Theory Methods* 46, 5195-5202  
676 (2017).  
677
- 678 R Core Team. R: A language and environment for statistical computing. R Foundation for  
679 Statistical Computing, Vienna, Austria. URL <http://www.R-project.org/> (2015).  
680
- 681 RStudio Team. RStudio: Integrated Development for R. RStudio, Inc., Boston, MA URL  
682 <http://www.rstudio.com/> (2015).  
683
- 684 The Australia Government, Bureau of Meteorology at <http://www.bom.gov.au> (2012)

685 Extended data

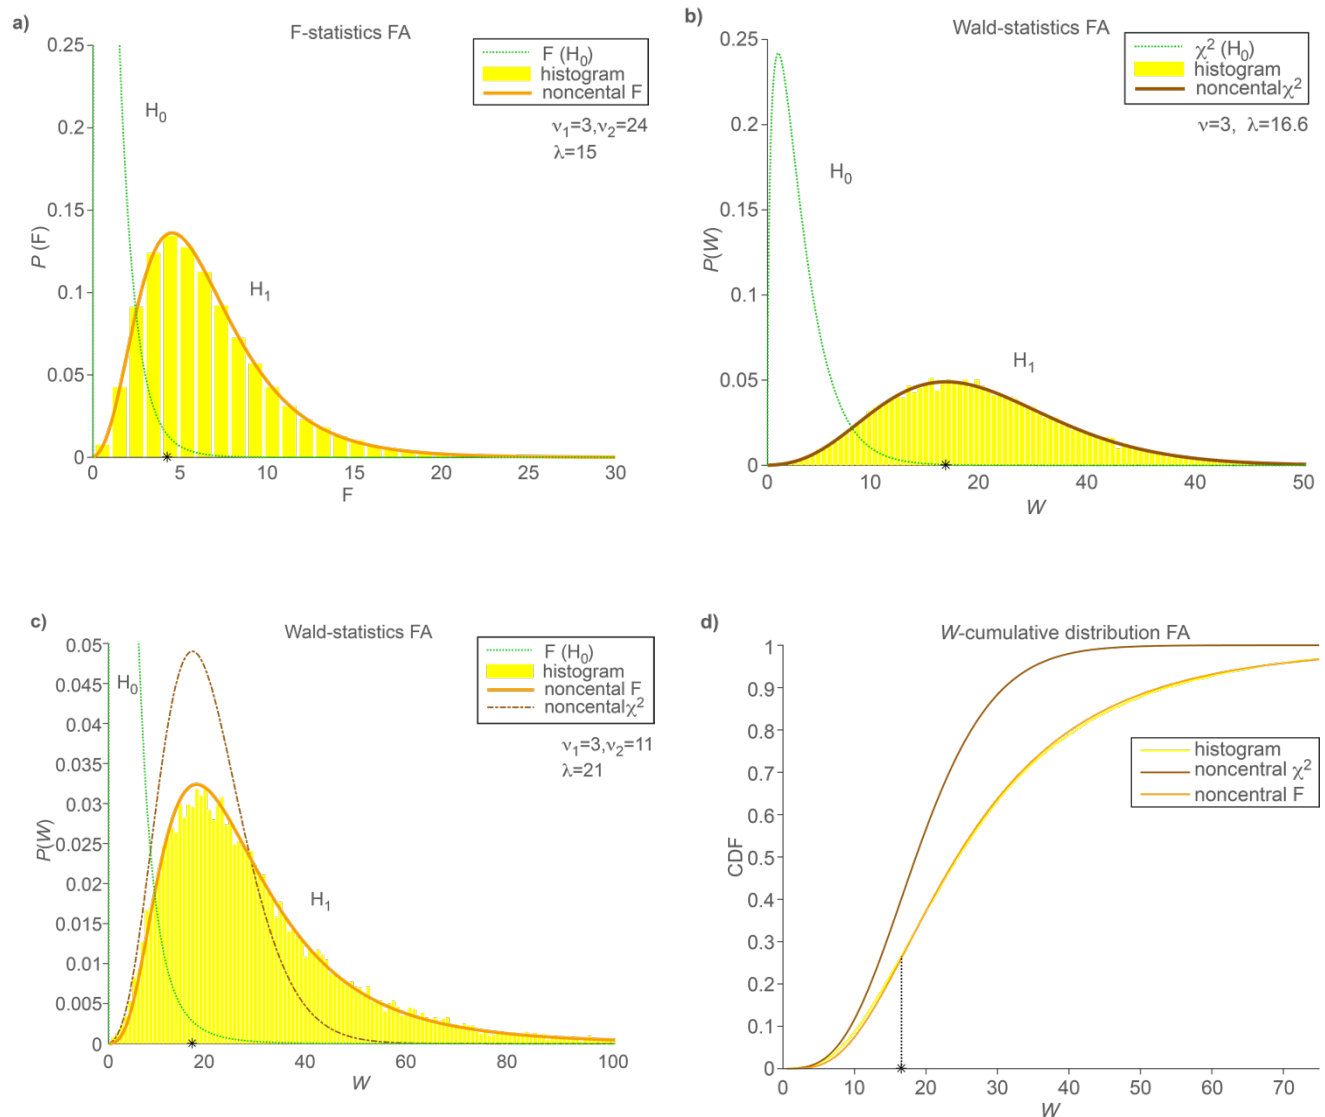

686

687

688 **Extended Figure 1 MC simulations for the statistically significant FA group.**

689 Each histogram consists of 20,000 independent realizations that are generated according to

690 Eqs. (1-2). Asterisk marks the empirical value.

691 (a) Histogram of the ANOVA  $F_g$  statistic (Eq. 6) compared to the non-central F-distribution

692 ( $H_1$ ) with parameters  $\nu_1 = T - 1 = 3$ ,  $\nu_2 = T(N - 1) = 24$ ,  $\lambda_F = \bar{m}_F \nu_1 (\nu_2 - 2) / 2 -$

693  $\nu_1 = 15$ . The probability distribution of the null hypothesis ( $H_0$ ) is obtained by setting  $\lambda_F =$

694 0.

695 (b) The non-central  $\chi^2$  distribution ( $H_1$ ) describing the Wald statistic  $W_g$  in the limit of large  
696 samples ( $N \gg 1$ ). Here,  $\nu_1 = T - 1 = 3$ ,  $\lambda_w = \bar{m}_w - \nu_1 = 16.6$ . For the null hypothesis  
697 ( $H_0$ ),  $\lambda_w = 0$ .

698 (c) Histogram of  $W_g$  for finite-size samples (Eq. 7), compared to the scaled non-central F-  
699 distribution ( $H_1$ ) for the random variable  $f = W_g/(T - 1)$ . The parameters of ( $H_1$ ) are  $\nu_1 =$   
700  $T - 1 = 3$ ,  $\nu_2 = N(T - 2) - (T - 1) = 11$ .  $\lambda_w = \bar{m}_w \nu_1 (\nu_2 - 2) / [2(T - 1)] - \nu_1 = 21$ .  
701 For ( $H_0$ ),  $\lambda_w = 0$ . The asymptotic  $\chi^2$  distribution (b) is shown as a dashed line.

702 (d) The cumulative distribution functions (CDF) of the Wald statistics, comparing the  
703 empirical distribution with the expected  $\chi^2$  and scaled-F distributions.

704 Note that the only free (fitting) parameters in (a-d) are the sampled means  $\{\bar{m}_F, \bar{m}_W\}$  which  
705 are obtained by averaging over all realizations of  $\{F_g, W_g\}$ , respectively.

706

707 **Extended Table 1: Multilevel model examining the effect of sex, antibiotic treatment,**  
 708 **and thermal regime on B haplotype frequency change, as a response variable.**

709

|                                           | $\chi^2$ | d.f. | $P(>\chi^2)$ |
|-------------------------------------------|----------|------|--------------|
| Intercept                                 | 0.1518   | 1    | 0.696824     |
| sex                                       | 0.8269   | 1    | 0.363163     |
| antibiotic treatment                      | 0.0850   | 1    | 0.770666     |
| thermal regime                            | 1.9834   | 3    | 0.575866     |
| antibiotic treatment: thermal regime      | 8.9186   | 3    | 0.030393     |
| sex: antibiotic treatment                 | 0.0326   | 1    | 0.856811     |
| sex: thermal regime                       | 15.4599  | 3    | 0.001463     |
| sex: antibiotic treatment: thermal regime | 10.7419  | 3    | 0.013207     |
|                                           |          |      |              |
|                                           | $\sigma$ |      |              |
| ID                                        | 0.119988 |      |              |
| Population                                | 0.009593 |      |              |

710

711

712 Sex, antibiotic treatment, and thermal regime were modelled as fixed effects. ID and

713 Population were modelled as random effects.

714 Population indicates the biological replicate i.e., group of 4 bottles descending from a single

715 starting bottle. ID pairs males and females which are sharing the same bottle. The yellow

716 background indicates statistical significance.

717

718 **Extended Table 2: The fixed parameters,  $\hat{\theta}_{gi}$ , and their errors,  $\delta\hat{\theta}_{gi}$ , for 4 population**  
 719 **groups (FA, FN, MA, MN), evaluated by three schemes of estimation: (I) linear mixed**  
 720 **model (II) fix effects only (III) *lme4*.**

721

| model of error(†) | group(‡) | 19°C             |                           | 25°C             |                           | fluctuating cold |                           | fluctuating warm |                           |
|-------------------|----------|------------------|---------------------------|------------------|---------------------------|------------------|---------------------------|------------------|---------------------------|
|                   |          | $\hat{\theta}_1$ | $\pm\delta\hat{\theta}_1$ | $\hat{\theta}_2$ | $\pm\delta\hat{\theta}_2$ | $\hat{\theta}_3$ | $\pm\delta\hat{\theta}_3$ | $\hat{\theta}_4$ | $\pm\delta\hat{\theta}_4$ |
| (I)               | FA(7)    | +0.0409          | 0.0348                    | -0.0506          | 0.0529                    | +0.0601          | 0.0319                    | -0.1477          | 0.0457                    |
| (II)              |          |                  | 0.0354                    |                  | 0.0537                    |                  | 0.0324                    |                  | 0.0464                    |
| (III)             |          |                  | 0.0428                    |                  | 0.0428                    |                  | 0.0428                    |                  | 0.0428                    |
| (I)               | FN(8)    | +0.0195          | 0.0584                    | -0.0150          | 0.0490                    | -0.0525          | 0.0443                    | +0.0400          | 0.0657                    |
| (II)              |          |                  | 0.0589                    |                  | 0.0494                    |                  | 0.0446                    |                  | 0.0663                    |
| (III)             |          |                  | 0.0554                    |                  | 0.0554                    |                  | 0.0554                    |                  | 0.0554                    |
| (I)               | MA(7)    | -0.0029          | 0.0438                    | -0.0563          | 0.0543                    | -0.0809          | 0.0335                    | -0.0266          | 0.0584                    |
| (II)              |          |                  | 0.0442                    |                  | 0.0548                    |                  | 0.0338                    |                  | 0.0590                    |
| (III)             |          |                  | 0.0489                    |                  | 0.0489                    |                  | 0.0489                    |                  | 0.0489                    |
| (I)               | MN(8)    | -0.0144          | 0.0409                    | +0.1329          | 0.0590                    | -0.0795          | 0.0405                    | +0.0866          | 0.0706                    |
| (II)              |          |                  | 0.0418                    |                  | 0.0604                    |                  | 0.0414                    |                  | 0.0723                    |
| (III)             |          |                  | 0.0555                    |                  | 0.0555                    |                  | 0.0555                    |                  | 0.0555                    |

722

723 † (I)  $\delta\hat{\theta}_{gi}$  according to Eq. (5). (II)  $\delta\hat{\theta}_{gi} = \hat{\sigma}_{gi}/\sqrt{N}$  (i.e., assuming that  $\rho_g^n \equiv 0$ ). ‡ the  
 724 numbers in parenthesis indicate the sample-size ( $N = 7, 8$  replicates for each thermal level).

725

726

727 Supplementary Information Legends

728

729 **Supplementary Table 1: List of samples**

730 In experimental populations ATB1-ATB7, the ancestors had been exposed to antibiotic  
731 treatment, while experimental populations UTR1-UTR8 correspond with untreated flies.

732 **Supplementary Table 2: Fly food composition**

733 **Supplementary Table 3: Starting dates of experimental populations.**

734 Foundation date marks the date at which virgin flies were combined in a bottle as outlined in  
735 Admixture Step 2 (Fig. 2) to form the Starting generation. In Admixture Step 1, we allowed  
736 their parents to lay eggs for about 1 day, and transferred them to a new bottle. This process  
737 was repeated across nine days. We call the process by which we transfer the flies to a new  
738 bottle a “tip”. Virgin flies of each sex were sourced from several tips, in order to ensure we  
739 had an adequate supply of flies to initiate the experimental populations. We show the dates of  
740 maternal ovipositioning and virgin collection in a separate column (date). Number means the  
741 number of virgin flies sourced from the tip.

742 **Supplementary Table 4: Propagation of experimental populations in dates.**

743 Foundation date corresponds with Supplementary Table 3. We imposed the four different  
744 thermal regimes on multiple generations starting by eggs laid by the Starting generation.  
745 Within each generation, the flies of each experimental bottle were transferred to new bottles,  
746 and the column “tip number” reflects the “tip” that was used to propagate the next generation  
747 per experimental population. Although the tip we used to initiate each experimental  
748 population varied in Generation 1, in subsequent generations, we propagated experimental  
749 populations mostly from the first tip.

750 **Supplementary Table 5: Selected SNPs characteristics and individual haplotypes.**

751 **Supplementary Table 6: The Wald statistics of the mixed model obtained with *lme4*,**  
752 **when the frequencies  $f_{gi}^n$  are subtracted from the corresponding frequencies in the**  
753 **starting generation (males and females combined).**
